# Supplementary material for: Active commute to school: does distance from school or walkability of the home neighbourhood matter? A national cross-sectional study of children aged 10–11 years, Scotland, UK
Source: PubMed Central journal article supplement (PMC7008418; doi:10.1136/bmjopen-2019-033628), 2019-12-23
Supplement: bmjopen-2019-033628supp002.pdf [file bmjopen-2019-033628supp002.pdf]

**Supplementary table**

| Home-to-school distance |                  |         |                  |         | Walkability               |                  |         |                  |         |
|-------------------------|------------------|---------|------------------|---------|---------------------------|------------------|---------|------------------|---------|
|                         | Active all       |         | Active 60%+      |         |                           | Active all       |         | Active 60%+      |         |
|                         | OR (95% CI)      | p-value | OR (95% CI)      | p-value |                           | OR (95% CI)      | p-value | OR (95% CI)      | p-value |
| <b>Unadjusted</b>       |                  |         |                  |         |                           |                  |         |                  |         |
| <0.5km                  | Ref.             |         |                  |         | <b>1 (Most walkable)</b>  | Ref.             |         |                  |         |
| <b>0.5 to &lt;1km</b>   | 0.27 (0.13-0.54) | <0.001  | 0.62 (0.23-1.68) | 0.340   | <b>2</b>                  | 0.52 (0.23-1.18) | 0.116   | 0.40 (0.19-0.84) | 0.016   |
| <b>1 to &lt;1.5km</b>   | 0.12(0.06-0.25)  | <0.001  | 0.22 (0.09-0.54) | 0.001   | <b>3</b>                  | 0.49 (0.22-1.06) | 0.069   | 0.27 (0.12-0.59) | 0.001   |
| <b>1.5 to &lt;2km</b>   | 0.10 (0.04-0.21) | <0.001  | 0.16 (0.06-0.38) | <0.001  | <b>4</b>                  | 0.44 (0.22-0.88) | 0.021   | 0.31 (0.14-0.69) | 0.005   |
| <b>2km+</b>             | 0.06 (0.03-0.13) | <0.001  | 0.10 (0.04-0.22) | <0.001  | <b>5 (Least walkable)</b> | 0.45 (0.24-0.82) | 0.011   | 0.24 (0.12-0.47) | <0.001  |

OR=Odds Ratio, CI= Confidence Intervals, p-value = Calculated Probability (level of marginal significance).
